# Supplementary material for: DenvInt: A database of protein–protein interactions between dengue virus and its hosts
Source: PLoS Negl Trop Dis. 2017 Oct 19;11(10):e0005879. doi: 10.1371/journal.pntd.0005879 (PMC5648114; doi:10.1371/journal.pntd.0005879)
Supplement: S2 File — Abbreviation: PPI, protein–protein interactions. (XLSX) [file pntd.0005879.s002.xlsx]

## Sheet: Sheet1
Dengue Serotype	Dengue Protein	Interaction type	Mosquito protein	Gene Symbol	NCBI	Method	Details	Author	Pubmed ID
1	C	interacts with	AAEL000752	5566633	http://www.ncbi.nlm.nih.gov/gene/?term=AAEL000752	Yeast Two hybrid test	Characterization of intracellular interactions between dengue virus and host proteins	Dumrong Mairiang	http://digitalcommons.wayne.edu/oa_dissertations/551
1	C	interacts with	AAEL000951	5567491	http://www.ncbi.nlm.nih.gov/gene/?term=AAEL000951	Yeast Two hybrid test	Characterization of intracellular interactions between dengue virus and host proteins	Dumrong Mairiang	http://digitalcommons.wayne.edu/oa_dissertations/551
1	C	interacts with	AAEL001892	5572813	http://www.ncbi.nlm.nih.gov/gene/?term=AAEL001892	Yeast Two hybrid test	Characterization of intracellular interactions between dengue virus and host proteins	Dumrong Mairiang	http://digitalcommons.wayne.edu/oa_dissertations/551
1	C	interacts with	AAEL002828	5576241	http://www.ncbi.nlm.nih.gov/gene/?term=AAEL002828	Yeast Two hybrid test	Characterization of intracellular interactions between dengue virus and host proteins	Dumrong Mairiang	http://digitalcommons.wayne.edu/oa_dissertations/551
1	C	interacts with	AAEL003415	5578090	http://www.ncbi.nlm.nih.gov/gene/?term=AAEL003415	Yeast Two hybrid test	Characterization of intracellular interactions between dengue virus and host proteins	Dumrong Mairiang	http://digitalcommons.wayne.edu/oa_dissertations/551
1	C	interacts with	AAEL003739	5578845	http://www.ncbi.nlm.nih.gov/gene/?term=AAEL003739	Yeast Two hybrid test	Characterization of intracellular interactions between dengue virus and host proteins	Dumrong Mairiang	http://digitalcommons.wayne.edu/oa_dissertations/551
1	C	interacts with	AAEL004484	5564924	http://www.ncbi.nlm.nih.gov/gene/?term=AAEL004484	Yeast Two hybrid test	Characterization of intracellular interactions between dengue virus and host proteins	Dumrong Mairiang	http://digitalcommons.wayne.edu/oa_dissertations/551
1	C	interacts with	AAEL005656	5566809	http://www.ncbi.nlm.nih.gov/gene/?term=AAEL005656	Yeast Two hybrid test	Characterization of intracellular interactions between dengue virus and host proteins	Dumrong Mairiang	http://digitalcommons.wayne.edu/oa_dissertations/551
1	C	interacts with	AAEL008052	5569954	http://www.ncbi.nlm.nih.gov/gene/?term=AAEL008052	Yeast Two hybrid test	Characterization of intracellular interactions between dengue virus and host proteins	Dumrong Mairiang	http://digitalcommons.wayne.edu/oa_dissertations/551
1	C	interacts with	AAEL009101	5571466	http://www.ncbi.nlm.nih.gov/gene/?term=AAEL009101	Yeast Two hybrid test	Characterization of intracellular interactions between dengue virus and host proteins	Dumrong Mairiang	http://digitalcommons.wayne.edu/oa_dissertations/551
1	C	interacts with	AAEL009948	5572673	http://www.ncbi.nlm.nih.gov/gene/?term=AAEL009948	Yeast Two hybrid test	Characterization of intracellular interactions between dengue virus and host proteins	Dumrong Mairiang	http://digitalcommons.wayne.edu/oa_dissertations/551
1	C	interacts with	AAEL010266	5573080	http://www.ncbi.nlm.nih.gov/gene/?term=AAEL010266	Yeast Two hybrid test	Characterization of intracellular interactions between dengue virus and host proteins	Dumrong Mairiang	http://digitalcommons.wayne.edu/oa_dissertations/551
1	C	interacts with	AAEL011129	5574403	http://www.ncbi.nlm.nih.gov/gene/?term=AAEL011129	Yeast Two hybrid test	Characterization of intracellular interactions between dengue virus and host proteins	Dumrong Mairiang	http://digitalcommons.wayne.edu/oa_dissertations/551
1	C	interacts with	AAEL013086	5577196	http://www.ncbi.nlm.nih.gov/gene/?term=AAEL013086	Yeast Two hybrid test	Characterization of intracellular interactions between dengue virus and host proteins	Dumrong Mairiang	http://digitalcommons.wayne.edu/oa_dissertations/551
1	C	interacts with	AAEL014012	5579140	http://www.ncbi.nlm.nih.gov/gene/?term=AAEL014012	Yeast Two hybrid test	Characterization of intracellular interactions between dengue virus and host proteins	Dumrong Mairiang	http://digitalcommons.wayne.edu/oa_dissertations/551
1	C	interacts with	AAEL014104	5563759	http://www.ncbi.nlm.nih.gov/gene/?term=AAEL014104	Yeast Two hybrid test	Characterization of intracellular interactions between dengue virus and host proteins	Dumrong Mairiang	http://digitalcommons.wayne.edu/oa_dissertations/551
1	E	interacts with	AAEL000950	5567469	http://www.ncbi.nlm.nih.gov/gene/?term=AAEL000950	Yeast Two hybrid test	Characterization of intracellular interactions between dengue virus and host proteins	Dumrong Mairiang	http://digitalcommons.wayne.edu/oa_dissertations/551
1	E	interacts with	AAEL003415	5578090	http://www.ncbi.nlm.nih.gov/gene/?term=AAEL003415	Yeast Two hybrid test	Characterization of intracellular interactions between dengue virus and host proteins	Dumrong Mairiang	http://digitalcommons.wayne.edu/oa_dissertations/551
1	E	interacts with	AAEL003929	5563790	http://www.ncbi.nlm.nih.gov/gene/?term=AAEL003929	Yeast Two hybrid test	Characterization of intracellular interactions between dengue virus and host proteins	Dumrong Mairiang	http://digitalcommons.wayne.edu/oa_dissertations/551
1	E	interacts with	AAEL005524	5579820	http://www.ncbi.nlm.nih.gov/gene/?term=AAEL005524	Yeast Two hybrid test	Characterization of intracellular interactions between dengue virus and host proteins	Dumrong Mairiang	http://digitalcommons.wayne.edu/oa_dissertations/551
1	E	interacts with	AAEL007850	5569719	http://www.ncbi.nlm.nih.gov/gene/?term=AAEL007850	Yeast Two hybrid test	Characterization of intracellular interactions between dengue virus and host proteins	Dumrong Mairiang	http://digitalcommons.wayne.edu/oa_dissertations/551
1	E	interacts with	AAEL007980	5569873	http://www.ncbi.nlm.nih.gov/gene/?term=AAEL007980	Yeast Two hybrid test	Characterization of intracellular interactions between dengue virus and host proteins	Dumrong Mairiang	http://digitalcommons.wayne.edu/oa_dissertations/551
1	E	interacts with	AAEL008700	5570968	http://www.ncbi.nlm.nih.gov/gene/?term=AAEL008700	Yeast Two hybrid test	Characterization of intracellular interactions between dengue virus and host proteins	Dumrong Mairiang	http://digitalcommons.wayne.edu/oa_dissertations/551
1	E	interacts with	AAEL011985	5575642	http://www.ncbi.nlm.nih.gov/gene/?term=AAEL011985	Yeast Two hybrid test	Characterization of intracellular interactions between dengue virus and host proteins	Dumrong Mairiang	http://digitalcommons.wayne.edu/oa_dissertations/551
1	E	interacts with	AAEL014012	5579140	http://www.ncbi.nlm.nih.gov/gene/?term=AAEL014012	Yeast Two hybrid test	Characterization of intracellular interactions between dengue virus and host proteins	Dumrong Mairiang	http://digitalcommons.wayne.edu/oa_dissertations/551
1	E	interacts with	AAEL014104	5563759	http://www.ncbi.nlm.nih.gov/gene/?term=AAEL014104	Yeast Two hybrid test	Characterization of intracellular interactions between dengue virus and host proteins	Dumrong Mairiang	http://digitalcommons.wayne.edu/oa_dissertations/551
2	C	interacts with	AAEL000950	5567469	http://www.ncbi.nlm.nih.gov/gene/?term=AAEL000950	Yeast Two hybrid test	Characterization of intracellular interactions between dengue virus and host proteins	Dumrong Mairiang	http://digitalcommons.wayne.edu/oa_dissertations/551
2	C	interacts with	AAEL002572	5580173	http://www.ncbi.nlm.nih.gov/gene/?term=AAEL002572	Yeast Two hybrid test	Characterization of intracellular interactions between dengue virus and host proteins	Dumrong Mairiang	http://digitalcommons.wayne.edu/oa_dissertations/551
2	C	interacts with	AAEL003929	5563790	http://www.ncbi.nlm.nih.gov/gene/?term=AAEL003929	Yeast Two hybrid test	Characterization of intracellular interactions between dengue virus and host proteins	Dumrong Mairiang	http://digitalcommons.wayne.edu/oa_dissertations/551
2	C	interacts with	AAEL006572	5568132	http://www.ncbi.nlm.nih.gov/gene/?term=AAEL006572	Yeast Two hybrid test	Characterization of intracellular interactions between dengue virus and host proteins	Dumrong Mairiang	http://digitalcommons.wayne.edu/oa_dissertations/551
2	E	interacts with	AAEL003676	5578793	http://www.ncbi.nlm.nih.gov/gene/?term=AAEL003676	Yeast Two hybrid test	Characterization of intracellular interactions between dengue virus and host proteins	Dumrong Mairiang	http://digitalcommons.wayne.edu/oa_dissertations/551
2	E	interacts with	AAEL004855	5565544	http://www.ncbi.nlm.nih.gov/gene/?term=AAEL004855	Yeast Two hybrid test	Characterization of intracellular interactions between dengue virus and host proteins	Dumrong Mairiang	http://digitalcommons.wayne.edu/oa_dissertations/551
2	E	interacts with	AAEL005656	5566809	http://www.ncbi.nlm.nih.gov/gene/?term=AAEL005656	Yeast Two hybrid test	Characterization of intracellular interactions between dengue virus and host proteins	Dumrong Mairiang	http://digitalcommons.wayne.edu/oa_dissertations/551
2	E	interacts with	AAEL005790	5567037	http://www.ncbi.nlm.nih.gov/gene/?term=AAEL005790	Yeast Two hybrid test	Characterization of intracellular interactions between dengue virus and host proteins	Dumrong Mairiang	http://digitalcommons.wayne.edu/oa_dissertations/551
2	E	interacts with	AAEL010360	5573265	http://www.ncbi.nlm.nih.gov/gene/?term=AAEL010360	Yeast Two hybrid test	Characterization of intracellular interactions between dengue virus and host proteins	Dumrong Mairiang	http://digitalcommons.wayne.edu/oa_dissertations/551
2	E	interacts with	AAEL011960	5575632	http://www.ncbi.nlm.nih.gov/gene/?term=AAEL011960	Yeast Two hybrid test	Characterization of intracellular interactions between dengue virus and host proteins	Dumrong Mairiang	http://digitalcommons.wayne.edu/oa_dissertations/551
2	NS4B	interacts with	AAEL003064	5576993	http://www.ncbi.nlm.nih.gov/gene/?term=AAEL003064	Yeast Two hybrid test	Identification of New Protein Interactions between Dengue Fever Virus and Its Hosts, Human and Mosquito	Dumrong Mairiang et al.	PMID:23326450,PMC3543448
2	E	interacts with	AAEL001863	5572634	http://www.ncbi.nlm.nih.gov/gene/?term=AAEL001863	Yeast Two hybrid test	Protein-protein interactions between A. aegypti midgut and dengue virus 2: two-hybrid screens using the midgut cDNA library	Hong-Wai Tham ET AL.	PMID:26719940
2	E	interacts with	AAEL003530	5578368	http://www.ncbi.nlm.nih.gov/gene/?term=AAEL003530	Yeast Two hybrid test	Protein-protein interactions between A. aegypti midgut and dengue virus 2: two-hybrid screens using the midgut cDNA library	Hong-Wai Tham ET AL.	PMID:26719940
2	E	interacts with	AAEL005374	5566411	http://www.ncbi.nlm.nih.gov/gene/?term=AAEL005374	Yeast Two hybrid test	Protein-protein interactions between A. aegypti midgut and dengue virus 2: two-hybrid screens using the midgut cDNA library	Hong-Wai Tham ET AL.	PMID:26719940
2	E	interacts with	AAEL007818	5569681	http://www.ncbi.nlm.nih.gov/gene/5569681	Yeast Two hybrid test	Protein-protein interactions between A. aegypti midgut and dengue virus 2: two-hybrid screens using the midgut cDNA library	Hong-Wai Tham ET AL.	PMID:26719940
2	E	interacts with	AAEL008599	5570825	http://www.ncbi.nlm.nih.gov/gene/?term=AAEL008599	Yeast Two hybrid test	Protein-protein interactions between A. aegypti midgut and dengue virus 2: two-hybrid screens using the midgut cDNA library	Hong-Wai Tham ET AL.	PMID:26719940
2	E	interacts with	AAEL009151	5571564	http://www.ncbi.nlm.nih.gov/gene/?term=AAEL009151	Yeast Two hybrid test	Protein-protein interactions between A. aegypti midgut and dengue virus 2: two-hybrid screens using the midgut cDNA library	Hong-Wai Tham ET AL.	PMID:26719940
2	E	interacts with	AAEL010974	5574157	http://www.ncbi.nlm.nih.gov/gene/?term=AAEL010974	Yeast Two hybrid test	Protein-protein interactions between A. aegypti midgut and dengue virus 2: two-hybrid screens using the midgut cDNA library	Hong-Wai Tham ET AL.	PMID:26719940
2	NS1	interacts with	AAEL000393	5576330	http://www.ncbi.nlm.nih.gov/gene/?term=AAEL000393	Yeast Two hybrid test	Protein-protein interactions between A. aegypti midgut and dengue virus 2: two-hybrid screens using the midgut cDNA library	Hong-Wai Tham ET AL.	PMID:26719940
2	NS1	interacts with	AAEL001872	5572644	http://www.ncbi.nlm.nih.gov/gene/?term=AAEL001872	Yeast Two hybrid test	Protein-protein interactions between A. aegypti midgut and dengue virus 2: two-hybrid screens using the midgut cDNA library	Hong-Wai Tham ET AL.	PMID:26719940
2	NS1	interacts with	AAEL002827	5576214	http://www.ncbi.nlm.nih.gov/gene/?term=AAEL002827	Yeast Two hybrid test	Protein-protein interactions between A. aegypti midgut and dengue virus 2: two-hybrid screens using the midgut cDNA library	Hong-Wai Tham ET AL.	PMID:26719940
2	NS1	interacts with	AAEL003393	5577999	http://www.ncbi.nlm.nih.gov/gene/?term=AAEL003393	Yeast Two hybrid test	Protein-protein interactions between A. aegypti midgut and dengue virus 2: two-hybrid screens using the midgut cDNA library	Hong-Wai Tham ET AL.	PMID:26719940
2	NS1	interacts with	AAEL003582	5578625	http://www.ncbi.nlm.nih.gov/gene/?term=AAEL003582	Yeast Two hybrid test	Protein-protein interactions between A. aegypti midgut and dengue virus 2: two-hybrid screens using the midgut cDNA library	Hong-Wai Tham ET AL.	PMID:26719940
2	NS1	interacts with	AAEL004493	5564920	http://www.ncbi.nlm.nih.gov/gene/?term=AAEL004493	Yeast Two hybrid test	Protein-protein interactions between A. aegypti midgut and dengue virus 2: two-hybrid screens using the midgut cDNA library	Hong-Wai Tham ET AL.	PMID:26719940
2	NS1	interacts with	AAEL004869	5565616	http://www.ncbi.nlm.nih.gov/gene/?term=AAEL004869	Yeast Two hybrid test	Protein-protein interactions between A. aegypti midgut and dengue virus 2: two-hybrid screens using the midgut cDNA library	Hong-Wai Tham ET AL.	PMID:26719940
2	NS1	interacts with	AAEL005732	5566975	http://www.ncbi.nlm.nih.gov/gene/?term=AAEL005732	Yeast Two hybrid test	Protein-protein interactions between A. aegypti midgut and dengue virus 2: two-hybrid screens using the midgut cDNA library	Hong-Wai Tham ET AL.	PMID:26719940
2	NS1	interacts with	AAEL007683	5569510	http://www.ncbi.nlm.nih.gov/gene/?term=AAEL007683	Yeast Two hybrid test	Protein-protein interactions between A. aegypti midgut and dengue virus 2: two-hybrid screens using the midgut cDNA library	Hong-Wai Tham ET AL.	PMID:26719940
2	NS1	interacts with	AAEL007948	5569857	http://www.ncbi.nlm.nih.gov/gene/?term=AAEL007948	Yeast Two hybrid test	Protein-protein interactions between A. aegypti midgut and dengue virus 2: two-hybrid screens using the midgut cDNA library	Hong-Wai Tham ET AL.	PMID:26719940
2	NS1	interacts with	AAEL008169	5570208	http://www.ncbi.nlm.nih.gov/gene/?term=AAEL008169	Yeast Two hybrid test	Protein-protein interactions between A. aegypti midgut and dengue virus 2: two-hybrid screens using the midgut cDNA library	Hong-Wai Tham ET AL.	PMID:26719940
2	NS1	interacts with	AAEL008481	5570675	http://www.ncbi.nlm.nih.gov/gene/?term=AAEL008481	Yeast Two hybrid test	Protein-protein interactions between A. aegypti midgut and dengue virus 2: two-hybrid screens using the midgut cDNA library	Hong-Wai Tham ET AL.	PMID:26719940
2	NS1	interacts with	AAEL012713	5576684	http://www.ncbi.nlm.nih.gov/gene/?term=AAEL012713	Yeast Two hybrid test	Protein-protein interactions between A. aegypti midgut and dengue virus 2: two-hybrid screens using the midgut cDNA library	Hong-Wai Tham ET AL.	PMID:26719940
2	NS1	interacts with	AAEL012947	5577033	http://www.ncbi.nlm.nih.gov/gene/?term=AAEL012947	Yeast Two hybrid test	Protein-protein interactions between A. aegypti midgut and dengue virus 2: two-hybrid screens using the midgut cDNA library	Hong-Wai Tham ET AL.	PMID:26719940
2	NS1	interacts with	AAEL015740			Yeast Two hybrid test	Protein-protein interactions between A. aegypti midgut and dengue virus 2: two-hybrid screens using the midgut cDNA library	Hong-Wai Tham ET AL.	PMID:26719940
2	NS1	interacts with	AAEL015803	5577825	http://www.ncbi.nlm.nih.gov/gene/5577825	Yeast Two hybrid test	Protein-protein interactions between A. aegypti midgut and dengue virus 2: two-hybrid screens using the midgut cDNA library	Hong-Wai Tham ET AL.	PMID:26719940
2	PrM/M	interacts with	AAEL000511	5578456	http://www.ncbi.nlm.nih.gov/gene/?term=AAEL000511	Yeast Two hybrid test	Protein-protein interactions between A. aegypti midgut and dengue virus 2: two-hybrid screens using the midgut cDNA library	Hong-Wai Tham ET AL.	PMID:26719940
2	PrM/M	interacts with	AAEL000987	5567848	www.ncbi.nlm.nih.gov/gene/?term=AAEL000987	Yeast Two hybrid test	Protein-protein interactions between A. aegypti midgut and dengue virus 2: two-hybrid screens using the midgut cDNA library	Hong-Wai Tham ET AL.	PMID:26719940
2	PrM/M	interacts with	AAEL004493	5564920	http://www.ncbi.nlm.nih.gov/gene/?term=AAEL004493	Yeast Two hybrid test	Protein-protein interactions between A. aegypti midgut and dengue virus 2: two-hybrid screens using the midgut cDNA library	Hong-Wai Tham ET AL.	PMID:26719940
2	PrM/M	interacts with	AAEL005097	5565979	http://www.ncbi.nlm.nih.gov/gene/?term=AAEL005097	Yeast Two hybrid test	Protein-protein interactions between A. aegypti midgut and dengue virus 2: two-hybrid screens using the midgut cDNA library	Hong-Wai Tham ET AL.	PMID:26719940
2	PrM/M	interacts with	AAEL005374	5566411	http://www.ncbi.nlm.nih.gov/gene/?term=AAEL005374	Yeast Two hybrid test	Protein-protein interactions between A. aegypti midgut and dengue virus 2: two-hybrid screens using the midgut cDNA library	Hong-Wai Tham ET AL.	PMID:26719940
2	PrM/M	interacts with	AAEL005508	5566654	http://www.ncbi.nlm.nih.gov/gene/?term=AAEL005508	Yeast Two hybrid test	Protein-protein interactions between A. aegypti midgut and dengue virus 2: two-hybrid screens using the midgut cDNA library	Hong-Wai Tham ET AL.	PMID:26719940
2	PrM/M	interacts with	AAEL005981	5579869	http://www.ncbi.nlm.nih.gov/gene/?term=AAEL005981	Yeast Two hybrid test	Protein-protein interactions between A. aegypti midgut and dengue virus 2: two-hybrid screens using the midgut cDNA library	Hong-Wai Tham ET AL.	PMID:26719940
2	PrM/M	interacts with	AAEL006447	5568000	http://www.ncbi.nlm.nih.gov/gene/?term=AAEL006447	Yeast Two hybrid test	Protein-protein interactions between A. aegypti midgut and dengue virus 2: two-hybrid screens using the midgut cDNA library	Hong-Wai Tham ET AL.	PMID:26719940
2	PrM/M	interacts with	AAEL007649	5569478	http://www.ncbi.nlm.nih.gov/gene/?term=AAEL007649	Yeast Two hybrid test	Protein-protein interactions between A. aegypti midgut and dengue virus 2: two-hybrid screens using the midgut cDNA library	Hong-Wai Tham ET AL.	PMID:26719940
2	PrM/M	interacts with	AAEL007696	5569526	http://www.ncbi.nlm.nih.gov/gene/?term=AAEL007696	Yeast Two hybrid test	Protein-protein interactions between A. aegypti midgut and dengue virus 2: two-hybrid screens using the midgut cDNA library	Hong-Wai Tham ET AL.	PMID:26719940
2	PrM/M	interacts with	AAEL007818	5569681	http://www.ncbi.nlm.nih.gov/gene/5569681	Yeast Two hybrid test	Protein-protein interactions between A. aegypti midgut and dengue virus 2: two-hybrid screens using the midgut cDNA library	Hong-Wai Tham ET AL.	PMID:26719940
2	PrM/M	interacts with	AAEL007974	5569876	http://www.ncbi.nlm.nih.gov/gene/?term=AAEL007974	Yeast Two hybrid test	Protein-protein interactions between A. aegypti midgut and dengue virus 2: two-hybrid screens using the midgut cDNA library	Hong-Wai Tham ET AL.	PMID:26719940
2	PrM/M	interacts with	AAEL008599	5570825	http://www.ncbi.nlm.nih.gov/gene/?term=AAEL008599	Yeast Two hybrid test	Protein-protein interactions between A. aegypti midgut and dengue virus 2: two-hybrid screens using the midgut cDNA library	Hong-Wai Tham ET AL.	PMID:26719940
2	PrM/M	interacts with	AAEL009588	5572177	http://www.ncbi.nlm.nih.gov/gene/?term=AAEL009588	Yeast Two hybrid test	Protein-protein interactions between A. aegypti midgut and dengue virus 2: two-hybrid screens using the midgut cDNA library	Hong-Wai Tham ET AL.	PMID:26719940
2	PrM/M	interacts with	AAEL009888	5572566	http://www.ncbi.nlm.nih.gov/gene/?term=AAEL009888	Yeast Two hybrid test	Protein-protein interactions between A. aegypti midgut and dengue virus 2: two-hybrid screens using the midgut cDNA library	Hong-Wai Tham ET AL.	PMID:26719940
2	PrM/M	interacts with	AAEL011282	5574643	http://www.ncbi.nlm.nih.gov/gene/?term=AAEL011282	Yeast Two hybrid test	Protein-protein interactions between A. aegypti midgut and dengue virus 2: two-hybrid screens using the midgut cDNA library	Hong-Wai Tham ET AL.	PMID:26719940
2	PrM/M	interacts with	AAEL012781	5576793	http://www.ncbi.nlm.nih.gov/gene/?term=AAEL012781	Yeast Two hybrid test	Protein-protein interactions between A. aegypti midgut and dengue virus 2: two-hybrid screens using the midgut cDNA library	Hong-Wai Tham ET AL.	PMID:26719940
2	PrM/M	interacts with	AAEL015740			Yeast Two hybrid test	Protein-protein interactions between A. aegypti midgut and dengue virus 2: two-hybrid screens using the midgut cDNA library	Hong-Wai Tham ET AL.	PMID:26719940
3	C	interacts with	AAEL002508	5574980	http://www.ncbi.nlm.nih.gov/gene/?term=AAEL002508	Yeast Two hybrid test	Characterization of intracellular interactions between dengue virus and host proteins	Dumrong Mairiang	http://digitalcommons.wayne.edu/oa_dissertations/551
3	C	interacts with	AAEL004100	5564132	http://www.ncbi.nlm.nih.gov/gene/?term=AAEL004100	Yeast Two hybrid test	Characterization of intracellular interactions between dengue virus and host proteins	Dumrong Mairiang	http://digitalcommons.wayne.edu/oa_dissertations/551
3	C	interacts with	AAEL004869	5565616	http://www.ncbi.nlm.nih.gov/gene/?term=AAEL004869	Yeast Two hybrid test	Identification of New Protein Interactions between Dengue Fever Virus and Its Hosts, Human and Mosquito	Dumrong Mairiang et al.	PMID:23326450,PMC3543448
4	C	interacts with	AAEL000136	5567794	http://www.ncbi.nlm.nih.gov/gene/?term=AAEL000136		Characterization of intracellular interactions between dengue virus and host proteins	Dumrong Mairiang	http://digitalcommons.wayne.edu/oa_dissertations/552
4	E	interacts with	AAEL001553	5571273	http://www.ncbi.nlm.nih.gov/gene/?term=AAEL001553	Yeast Two hybrid test	Characterization of intracellular interactions between dengue virus and host proteins	Dumrong Mairiang	http://digitalcommons.wayne.edu/oa_dissertations/551
0
1,2	C	interacts with	AAEL002565	5580168	http://www.ncbi.nlm.nih.gov/gene/?term=AAEL002565	Yeast Two hybrid test	Characterization of intracellular interactions between dengue virus and host proteins	Dumrong Mairiang	http://digitalcommons.wayne.edu/oa_dissertations/551
1,2	C	interacts with	AAEL005165	5566087	http://www.ncbi.nlm.nih.gov/gene/?term=AAEL005165	Yeast Two hybrid test	Characterization of intracellular interactions between dengue virus and host proteins	Dumrong Mairiang	http://digitalcommons.wayne.edu/oa_dissertations/551
1,2	C	interacts with	AAEL007850	5569719	http://www.ncbi.nlm.nih.gov/gene/?term=AAEL007850	Yeast Two hybrid test	Characterization of intracellular interactions between dengue virus and host proteins	Dumrong Mairiang	http://digitalcommons.wayne.edu/oa_dissertations/551
1,2	C	interacts with	AAEL008700	5570968	http://www.ncbi.nlm.nih.gov/gene/?term=AAEL008700	Yeast Two hybrid test	Characterization of intracellular interactions between dengue virus and host proteins	Dumrong Mairiang	http://digitalcommons.wayne.edu/oa_dissertations/551
1,2	C	interacts with	AAEL012686	5576653	http://www.ncbi.nlm.nih.gov/gene/?term=AAEL012686	Yeast Two hybrid test	Characterization of intracellular interactions between dengue virus and host proteins	Dumrong Mairiang	http://digitalcommons.wayne.edu/oa_dissertations/551
1,2	E	interacts with	AAEL004316	5564548	http://www.ncbi.nlm.nih.gov/gene/?term=AAEL004316	Yeast Two hybrid test	Characterization of intracellular interactions between dengue virus and host proteins	Dumrong Mairiang	http://digitalcommons.wayne.edu/oa_dissertations/551
1,2	E	interacts with	AAEL006572	5568132	http://www.ncbi.nlm.nih.gov/gene/?term=AAEL006572	Yeast Two hybrid test	Characterization of intracellular interactions between dengue virus and host proteins	Dumrong Mairiang	http://digitalcommons.wayne.edu/oa_dissertations/551
1,2	E	interacts with	AAEL009357	5571874	http://www.ncbi.nlm.nih.gov/gene/?term=AAEL009357	Yeast Two hybrid test	Characterization of intracellular interactions between dengue virus and host proteins	Dumrong Mairiang	http://digitalcommons.wayne.edu/oa_dissertations/551
1,2	E	interacts with	AAEL010266	5573080	http://www.ncbi.nlm.nih.gov/gene/?term=AAEL010266	Yeast Two hybrid test	Characterization of intracellular interactions between dengue virus and host proteins	Dumrong Mairiang	http://digitalcommons.wayne.edu/oa_dissertations/551
1,2	E	interacts with	AAEL012527	5576438	http://www.ncbi.nlm.nih.gov/gene/?term=AAEL012527	Yeast Two hybrid test	Characterization of intracellular interactions between dengue virus and host proteins	Dumrong Mairiang	http://digitalcommons.wayne.edu/oa_dissertations/551
1,2	E	interacts with	AAEL012827	5576841	http://www.ncbi.nlm.nih.gov/gene/?term=AAEL012827	Yeast Two hybrid test	Characterization of intracellular interactions between dengue virus and host proteins	Dumrong Mairiang	http://digitalcommons.wayne.edu/oa_dissertations/551
1,2	E	interacts with	AAEL013583	5578243	http://www.ncbi.nlm.nih.gov/gene/?term=AAEL013583	Yeast Two hybrid test	Characterization of intracellular interactions between dengue virus and host proteins	Dumrong Mairiang	http://digitalcommons.wayne.edu/oa_dissertations/551
1,2	NS3	interacts with	AAEL000950	5567469	http://www.ncbi.nlm.nih.gov/gene/?term=AAEL000950	Yeast Two hybrid test	Identification of New Protein Interactions between Dengue Fever Virus and Its Hosts, Human and Mosquito	Dumrong Mairiang et al.	PMID:23326450,PMC3543448
1,2	NS3	interacts with	AAEL002572	5580173	http://www.ncbi.nlm.nih.gov/gene/?term=AAEL002572	Yeast Two hybrid test	Identification of New Protein Interactions between Dengue Fever Virus and Its Hosts, Human and Mosquito	Dumrong Mairiang et al.	PMID:23326450,PMC3543448
1,2	NS5	interacts with	AAEL000436	5577326	http://www.ncbi.nlm.nih.gov/gene/?term=AAEL000436	Yeast Two hybrid test	Identification of New Protein Interactions between Dengue Fever Virus and Its Hosts, Human and Mosquito	Dumrong Mairiang et al.	PMID:23326450,PMC3543448
1,2	NS5	interacts with	AAEL000951	5567491	http://www.ncbi.nlm.nih.gov/gene/?term=AAEL000951	Yeast Two hybrid test	Identification of New Protein Interactions between Dengue Fever Virus and Its Hosts, Human and Mosquito	Dumrong Mairiang et al.	PMID:23326450,PMC3543448
1,2	NS5	interacts with	AAEL005037	5565854	http://www.ncbi.nlm.nih.gov/gene/?term=AAEL005037	Yeast Two hybrid test	Identification of New Protein Interactions between Dengue Fever Virus and Its Hosts, Human and Mosquito	Dumrong Mairiang et al.	PMID:23326450,PMC3543448
1,2	NS5	interacts with	AAEL005524	5579820	http://www.ncbi.nlm.nih.gov/gene/?term=AAEL005524	Yeast Two hybrid test	Identification of New Protein Interactions between Dengue Fever Virus and Its Hosts, Human and Mosquito	Dumrong Mairiang et al.	PMID:23326450,PMC3543448
1,2	NS5	interacts with	AAEL008700	5570968	http://www.ncbi.nlm.nih.gov/gene/?term=AAEL008700	Yeast Two hybrid test	Identification of New Protein Interactions between Dengue Fever Virus and Its Hosts, Human and Mosquito	Dumrong Mairiang et al.	PMID:23326450,PMC3543448
1,2	NS5	interacts with	AAEL010005	5572728	http://www.ncbi.nlm.nih.gov/gene/?term=AAEL010005	Yeast Two hybrid test	Identification of New Protein Interactions between Dengue Fever Virus and Its Hosts, Human and Mosquito	Dumrong Mairiang et al.	PMID:23326450,PMC3543448
1,2	NS5	interacts with	AAEL010012	5572735	http://www.ncbi.nlm.nih.gov/gene/?term=AAEL010012	Yeast Two hybrid test	Identification of New Protein Interactions between Dengue Fever Virus and Its Hosts, Human and Mosquito	Dumrong Mairiang et al.	PMID:23326450,PMC3543448
1,2	NS5	interacts with	AAEL011988	5575675	http://www.ncbi.nlm.nih.gov/gene/?term=AAEL011988	Yeast Two hybrid test	Identification of New Protein Interactions between Dengue Fever Virus and Its Hosts, Human and Mosquito	Dumrong Mairiang et al.	PMID:23326450,PMC3543448
1,2	PrM/M	interacts with	AAEL007406	5569150	http://www.ncbi.nlm.nih.gov/gene/?term=AAEL007406	Yeast Two hybrid test	Identification of New Protein Interactions between Dengue Fever Virus and Its Hosts, Human and Mosquito	Dumrong Mairiang et al.	PMID:23326450,PMC3543448
1,2,3	C	interacts with	AAEL000292	5573738	http://www.ncbi.nlm.nih.gov/gene/?term=AAEL000292	Yeast Two hybrid test	Identification of New Protein Interactions between Dengue Fever Virus and Its Hosts, Human and Mosquito	Dumrong Mairiang et al.	PMID:23326450,PMC3543448
1,2,3	C	interacts with	AAEL003676	5578793	http://www.ncbi.nlm.nih.gov/gene/?term=AAEL003676	Yeast Two hybrid test	Identification of New Protein Interactions between Dengue Fever Virus and Its Hosts, Human and Mosquito	Dumrong Mairiang et al.	PMID:23326450,PMC3543448
1,2,3	C	interacts with	AAEL004316	5564548	http://www.ncbi.nlm.nih.gov/gene/?term=AAEL004316	Yeast Two hybrid test	Identification of New Protein Interactions between Dengue Fever Virus and Its Hosts, Human and Mosquito	Dumrong Mairiang et al.	PMID:23326450,PMC3543448
1,2,3	NS3	interacts with	AAEL005165	5566087	http://www.ncbi.nlm.nih.gov/gene/?term=AAEL005165	Yeast Two hybrid test	Identification of New Protein Interactions between Dengue Fever Virus and Its Hosts, Human and Mosquito	Dumrong Mairiang et al.	PMID:23326450,PMC3543448
1,2,3	NS3	interacts with	AAEL010821	5573974	http://www.ncbi.nlm.nih.gov/gene/?term=AAEL010821	Yeast Two hybrid test	Identification of New Protein Interactions between Dengue Fever Virus and Its Hosts, Human and Mosquito	Dumrong Mairiang et al.	PMID:23326450,PMC3543448
1,2,3	NS3	interacts with	AAEL013933	5578954	http://www.ncbi.nlm.nih.gov/gene/?term=AAEL013933	Yeast Two hybrid test	Identification of New Protein Interactions between Dengue Fever Virus and Its Hosts, Human and Mosquito	Dumrong Mairiang et al.	PMID:23326450,PMC3543448
1,2,3	NS4A	interacts with	AAEL012686	5576653	http://www.ncbi.nlm.nih.gov/gene/?term=AAEL012686	Yeast Two hybrid test	Identification of New Protein Interactions between Dengue Fever Virus and Its Hosts, Human and Mosquito	Dumrong Mairiang et al.	PMID:23326450,PMC3543448
1,2,3	NS5	interacts with	AAEL002828	5576241	http://www.ncbi.nlm.nih.gov/gene/?term=AAEL002828	Yeast Two hybrid test	Identification of New Protein Interactions between Dengue Fever Virus and Its Hosts, Human and Mosquito	Dumrong Mairiang et al.	PMID:23326450,PMC3543448
1,2,3	NS5	interacts with	AAEL003104	5577066	http://www.ncbi.nlm.nih.gov/gene/?term=AAEL003104	Yeast Two hybrid test	Identification of New Protein Interactions between Dengue Fever Virus and Its Hosts, Human and Mosquito	Dumrong Mairiang et al.	PMID:23326450,PMC3543448
1,2,3	NS5	interacts with	AAEL003415	5578090	http://www.ncbi.nlm.nih.gov/gene/?term=AAEL003415	Yeast Two hybrid test	Identification of New Protein Interactions between Dengue Fever Virus and Its Hosts, Human and Mosquito	Dumrong Mairiang et al.	PMID:23326450,PMC3543448
1,2,3	NS5	interacts with	AAEL003929	5563790	http://www.ncbi.nlm.nih.gov/gene/?term=AAEL003929	Yeast Two hybrid test	Identification of New Protein Interactions between Dengue Fever Virus and Its Hosts, Human and Mosquito	Dumrong Mairiang et al.	PMID:23326450,PMC3543448
1,2,3	NS5	interacts with	AAEL004500	5564921	http://www.ncbi.nlm.nih.gov/gene/?term=AAEL004500	Yeast Two hybrid test	Identification of New Protein Interactions between Dengue Fever Virus and Its Hosts, Human and Mosquito	Dumrong Mairiang et al.	PMID:23326450,PMC3543448
1,2,3	NS5	interacts with	AAEL004783	5565400	http://www.ncbi.nlm.nih.gov/gene/?term=AAEL004783	Yeast Two hybrid test	Identification of New Protein Interactions between Dengue Fever Virus and Its Hosts, Human and Mosquito	Dumrong Mairiang et al.	PMID:23326450,PMC3543448
1,2,3	NS5	interacts with	AAEL005165	5566087	http://www.ncbi.nlm.nih.gov/gene/?term=AAEL005165	Yeast Two hybrid test	Identification of New Protein Interactions between Dengue Fever Virus and Its Hosts, Human and Mosquito	Dumrong Mairiang et al.	PMID:23326450,PMC3543448
1,2,3	NS5	interacts with	AAEL005656	5566809	http://www.ncbi.nlm.nih.gov/gene/?term=AAEL005656	Yeast Two hybrid test	Identification of New Protein Interactions between Dengue Fever Virus and Its Hosts, Human and Mosquito	Dumrong Mairiang et al.	PMID:23326450,PMC3543448
1,2,3	NS5	interacts with	AAEL005733	5566990	http://www.ncbi.nlm.nih.gov/gene/?term=AAEL005733	Yeast Two hybrid test	Identification of New Protein Interactions between Dengue Fever Virus and Its Hosts, Human and Mosquito	Dumrong Mairiang et al.	PMID:23326450,PMC3543448
1,2,3	NS5	interacts with	AAEL006577	5568150	http://www.ncbi.nlm.nih.gov/gene/?term=AAEL006577	Yeast Two hybrid test	Identification of New Protein Interactions between Dengue Fever Virus and Its Hosts, Human and Mosquito	Dumrong Mairiang et al.	PMID:23326450,PMC3543448
1,2,3	NS5	interacts with	AAEL007980	5569873	http://www.ncbi.nlm.nih.gov/gene/?term=AAEL007980	Yeast Two hybrid test	Identification of New Protein Interactions between Dengue Fever Virus and Its Hosts, Human and Mosquito	Dumrong Mairiang et al.	PMID:23326450,PMC3543448
1,2,3	NS5	interacts with	AAEL009182	5571603	http://www.ncbi.nlm.nih.gov/gene/?term=AAEL009182	Yeast Two hybrid test	Identification of New Protein Interactions between Dengue Fever Virus and Its Hosts, Human and Mosquito	Dumrong Mairiang et al.	PMID:23326450,PMC3543448
1,2,3	NS5	interacts with	AAEL009357	5571874	http://www.ncbi.nlm.nih.gov/gene/?term=AAEL009357	Yeast Two hybrid test	Identification of New Protein Interactions between Dengue Fever Virus and Its Hosts, Human and Mosquito	Dumrong Mairiang et al.	PMID:23326450,PMC3543448
1,2,3	NS5	interacts with	AAEL010360	5573265	http://www.ncbi.nlm.nih.gov/gene/?term=AAEL010360	Yeast Two hybrid test	Identification of New Protein Interactions between Dengue Fever Virus and Its Hosts, Human and Mosquito	Dumrong Mairiang et al.	PMID:23326450,PMC3543448
1,2,3	NS5	interacts with	AAEL010507	5573461	http://www.ncbi.nlm.nih.gov/gene/?term=AAEL010507	Yeast Two hybrid test	Identification of New Protein Interactions between Dengue Fever Virus and Its Hosts, Human and Mosquito	Dumrong Mairiang et al.	PMID:23326450,PMC3543448
1,2,3	NS5	interacts with	AAEL010784	5573866	http://www.ncbi.nlm.nih.gov/gene/?term=AAEL010784	Yeast Two hybrid test	Identification of New Protein Interactions between Dengue Fever Virus and Its Hosts, Human and Mosquito	Dumrong Mairiang et al.	PMID:23326450,PMC3543448
1,2,3	NS5	interacts with	AAEL010821	5573974	http://www.ncbi.nlm.nih.gov/gene/?term=AAEL010821	Yeast Two hybrid test	Identification of New Protein Interactions between Dengue Fever Virus and Its Hosts, Human and Mosquito	Dumrong Mairiang et al.	PMID:23326450,PMC3543448
1,2,3	NS5	interacts with	AAEL012827	5576841	http://www.ncbi.nlm.nih.gov/gene/?term=AAEL012827	Yeast Two hybrid test	Identification of New Protein Interactions between Dengue Fever Virus and Its Hosts, Human and Mosquito	Dumrong Mairiang et al.	PMID:23326450,PMC3543448
1,2,3	NS5	interacts with	AAEL013086	5577196	http://www.ncbi.nlm.nih.gov/gene/?term=AAEL013086	Yeast Two hybrid test	Identification of New Protein Interactions between Dengue Fever Virus and Its Hosts, Human and Mosquito	Dumrong Mairiang et al.	PMID:23326450,PMC3543448
1,2,3,4	C	interacts with	AAEL004855	5565544	http://www.ncbi.nlm.nih.gov/gene/?term=AAEL004855	Yeast Two hybrid test	Characterization of intracellular interactions between dengue virus and host proteins	Dumrong Mairiang	http://digitalcommons.wayne.edu/oa_dissertations/551
1,2,3,4	C	interacts with	AAEL007980	5569873	http://www.ncbi.nlm.nih.gov/gene/?term=AAEL007980	Yeast Two hybrid test	Characterization of intracellular interactions between dengue virus and host proteins	Dumrong Mairiang	http://digitalcommons.wayne.edu/oa_dissertations/551
1,2,3,4	C	interacts with	AAEL000005	5563587	http://www.ncbi.nlm.nih.gov/gene/?term=AAEL000005	Yeast Two hybrid test	Identification of New Protein Interactions between Dengue Fever Virus and Its Hosts, Human and Mosquito	Dumrong Mairiang et al.	PMID:23326450,PMC3543448
1,2,3,4	C	interacts with	AAEL001984	5573120	http://www.ncbi.nlm.nih.gov/gene/?term=AAEL001984	Yeast Two hybrid test	Identification of New Protein Interactions between Dengue Fever Virus and Its Hosts, Human and Mosquito	Dumrong Mairiang et al.	PMID:23326450,PMC3543448
1,2,3,4	C	interacts with	AAEL002057	5573397	http://www.ncbi.nlm.nih.gov/gene/?term=AAEL002057	Yeast Two hybrid test	Identification of New Protein Interactions between Dengue Fever Virus and Its Hosts, Human and Mosquito	Dumrong Mairiang et al.	PMID:23326450,PMC3543448
1,2,3,4	C	interacts with	AAEL003750	5578927	http://www.ncbi.nlm.nih.gov/gene/?term=AAEL003750	Yeast Two hybrid test	Identification of New Protein Interactions between Dengue Fever Virus and Its Hosts, Human and Mosquito	Dumrong Mairiang et al.	PMID:23326450,PMC3543448
1,2,3,4	C	interacts with	AAEL008852	5571137	http://www.ncbi.nlm.nih.gov/gene/?term=AAEL008852	Yeast Two hybrid test	Identification of New Protein Interactions between Dengue Fever Virus and Its Hosts, Human and Mosquito	Dumrong Mairiang et al.	PMID:23326450,PMC3543448
1,2,3,4	C	interacts with	AAEL009285	5571766	http://www.ncbi.nlm.nih.gov/gene/?term=AAEL009285	Yeast Two hybrid test	Identification of New Protein Interactions between Dengue Fever Virus and Its Hosts, Human and Mosquito	Dumrong Mairiang et al.	PMID:23326450,PMC3543448
1,2,3,4	C	interacts with	AAEL011960	5575632	http://www.ncbi.nlm.nih.gov/gene/?term=AAEL011960	Yeast Two hybrid test	Identification of New Protein Interactions between Dengue Fever Virus and Its Hosts, Human and Mosquito	Dumrong Mairiang et al.	PMID:23326450,PMC3543448
1,2,3,4	C	interacts with	AAEL011985	5575642	http://www.ncbi.nlm.nih.gov/gene/?term=AAEL011985	Yeast Two hybrid test	Identification of New Protein Interactions between Dengue Fever Virus and Its Hosts, Human and Mosquito	Dumrong Mairiang et al.	PMID:23326450,PMC3543448
1,2,3,4	C	interacts with	AAEL013075	5577193	http://www.ncbi.nlm.nih.gov/gene/?term=AAEL013075	Yeast Two hybrid test	Identification of New Protein Interactions between Dengue Fever Virus and Its Hosts, Human and Mosquito	Dumrong Mairiang et al.	PMID:23326450,PMC3543448
1,2,3,4	C	interacts with	AAEL013583	5578243	http://www.ncbi.nlm.nih.gov/gene/?term=AAEL013583	Yeast Two hybrid test	Identification of New Protein Interactions between Dengue Fever Virus and Its Hosts, Human and Mosquito	Dumrong Mairiang et al.	PMID:23326450,PMC3543448
1,2,3,4	NS3	interacts with	AAEL000136	5567794	http://www.ncbi.nlm.nih.gov/gene/?term=AAEL000136	Yeast Two hybrid test	Identification of New Protein Interactions between Dengue Fever Virus and Its Hosts, Human and Mosquito	Dumrong Mairiang et al.	PMID:23326450,PMC3543448
1,2,3,4	NS3	interacts with	AAEL001553	5571273	http://www.ncbi.nlm.nih.gov/gene/?term=AAEL001553	Yeast Two hybrid test	Identification of New Protein Interactions between Dengue Fever Virus and Its Hosts, Human and Mosquito	Dumrong Mairiang et al.	PMID:23326450,PMC3543448
1,2,3,4	NS3	interacts with	AAEL001892	5572813	http://www.ncbi.nlm.nih.gov/gene/?term=AAEL001892	Yeast Two hybrid test	Identification of New Protein Interactions between Dengue Fever Virus and Its Hosts, Human and Mosquito	Dumrong Mairiang et al.	PMID:23326450,PMC3543448
1,2,3,4	NS3	interacts with	AAEL002508	5574980	http://www.ncbi.nlm.nih.gov/gene/?term=AAEL002508	Yeast Two hybrid test	Identification of New Protein Interactions between Dengue Fever Virus and Its Hosts, Human and Mosquito	Dumrong Mairiang et al.	PMID:23326450,PMC3543448
1,2,3,4	NS3	interacts with	AAEL003345	5577897	http://www.ncbi.nlm.nih.gov/gene/?term=AAEL003345	Yeast Two hybrid test	Identification of New Protein Interactions between Dengue Fever Virus and Its Hosts, Human and Mosquito	Dumrong Mairiang et al.	PMID:23326450,PMC3543448
1,2,3,4	NS3	interacts with	AAEL003815	5579120	http://www.ncbi.nlm.nih.gov/gene/?term=AAEL003815	Yeast Two hybrid test	Identification of New Protein Interactions between Dengue Fever Virus and Its Hosts, Human and Mosquito	Dumrong Mairiang et al.	PMID:23326450,PMC3543448
1,2,3,4	NS3	interacts with	AAEL004100	5564132	http://www.ncbi.nlm.nih.gov/gene/?term=AAEL004100	Yeast Two hybrid test	Identification of New Protein Interactions between Dengue Fever Virus and Its Hosts, Human and Mosquito	Dumrong Mairiang et al.	PMID:23326450,PMC3543448
1,2,3,4	NS3	interacts with	AAEL004484	5564924	http://www.ncbi.nlm.nih.gov/gene/?term=AAEL004484	Yeast Two hybrid test	Identification of New Protein Interactions between Dengue Fever Virus and Its Hosts, Human and Mosquito	Dumrong Mairiang et al.	PMID:23326450,PMC3543448
1,2,3,4	NS3	interacts with	AAEL005567	5566684	http://www.ncbi.nlm.nih.gov/gene/?term=AAEL005567	Yeast Two hybrid test	Identification of New Protein Interactions between Dengue Fever Virus and Its Hosts, Human and Mosquito	Dumrong Mairiang et al.	PMID:23326450,PMC3543448
1,2,3,4	NS3	interacts with	AAEL007201	5568916	http://www.ncbi.nlm.nih.gov/gene/?term=AAEL007201	Yeast Two hybrid test	Identification of New Protein Interactions between Dengue Fever Virus and Its Hosts, Human and Mosquito	Dumrong Mairiang et al.	PMID:23326450,PMC3543448
1,2,3,4	NS3	interacts with	AAEL008052	5569954	http://www.ncbi.nlm.nih.gov/gene/?term=AAEL008052	Yeast Two hybrid test	Identification of New Protein Interactions between Dengue Fever Virus and Its Hosts, Human and Mosquito	Dumrong Mairiang et al.	PMID:23326450,PMC3543448
1,2,3,4	NS3	interacts with	AAEL008746	5571010	http://www.ncbi.nlm.nih.gov/gene/?term=AAEL008746	Yeast Two hybrid test	Identification of New Protein Interactions between Dengue Fever Virus and Its Hosts, Human and Mosquito	Dumrong Mairiang et al.	PMID:23326450,PMC3543448
1,2,3,4	NS3	interacts with	AAEL009101	5571466	http://www.ncbi.nlm.nih.gov/gene/?term=AAEL009101	Yeast Two hybrid test	Identification of New Protein Interactions between Dengue Fever Virus and Its Hosts, Human and Mosquito	Dumrong Mairiang et al.	PMID:23326450,PMC3543448
1,2,3,4	NS3	interacts with	AAEL009766	5572378	http://www.ncbi.nlm.nih.gov/gene/?term=AAEL009766	Yeast Two hybrid test	Identification of New Protein Interactions between Dengue Fever Virus and Its Hosts, Human and Mosquito	Dumrong Mairiang et al.	PMID:23326450,PMC3543448
1,2,3,4	NS3	interacts with	AAEL009948	5572673	http://www.ncbi.nlm.nih.gov/gene/?term=AAEL009948	Yeast Two hybrid test	Identification of New Protein Interactions between Dengue Fever Virus and Its Hosts, Human and Mosquito	Dumrong Mairiang et al.	PMID:23326450,PMC3543448
1,2,3,4	NS3	downregulated by	AAEL010585	5573545	http://www.ncbi.nlm.nih.gov/gene/?term=AAEL010585	Yeast Two hybrid test	Identification of New Protein Interactions between Dengue Fever Virus and Its Hosts, Human and Mosquito	Dumrong Mairiang et al.	PMID:23326450,PMC3543448
1,2,3,4	NS3	interacts with	AAEL011129	5574403	http://www.ncbi.nlm.nih.gov/gene/?term=AAEL011129	Yeast Two hybrid test	Identification of New Protein Interactions between Dengue Fever Virus and Its Hosts, Human and Mosquito	Dumrong Mairiang et al.	PMID:23326450,PMC3543448
1,2,3,4	NS3	interacts with	AAEL011137	5574420	http://www.ncbi.nlm.nih.gov/gene/?term=AAEL011137	Yeast Two hybrid test	Identification of New Protein Interactions between Dengue Fever Virus and Its Hosts, Human and Mosquito	Dumrong Mairiang et al.	PMID:23326450,PMC3543448
1,2,3,4	NS3	downregulated by	AAEL011708	5575238	http://www.ncbi.nlm.nih.gov/gene/?term=AAEL011708	Yeast Two hybrid test	Identification of New Protein Interactions between Dengue Fever Virus and Its Hosts, Human and Mosquito	Dumrong Mairiang et al.	PMID:23326450,PMC3543448
1,2,3,4	NS3	interacts with	AAEL011742	5575273	http://www.ncbi.nlm.nih.gov/gene/?term=AAEL011742	Yeast Two hybrid test	Identification of New Protein Interactions between Dengue Fever Virus and Its Hosts, Human and Mosquito	Dumrong Mairiang et al.	PMID:23326450,PMC3543448
1,2,3,4	NS3	interacts with	AAEL012556	5576503	http://www.ncbi.nlm.nih.gov/gene/?term=AAEL012556	Yeast Two hybrid test	Identification of New Protein Interactions between Dengue Fever Virus and Its Hosts, Human and Mosquito	Dumrong Mairiang et al.	PMID:23326450,PMC3543448
1,2,3,4	NS3	interacts with	AAEL012827	5576841	http://www.ncbi.nlm.nih.gov/gene/?term=AAEL012827	Yeast Two hybrid test	Identification of New Protein Interactions between Dengue Fever Virus and Its Hosts, Human and Mosquito	Dumrong Mairiang et al.	PMID:23326450,PMC3543448
1,2,3,4	NS3	interacts with	AAEL014396	5564364	http://www.ncbi.nlm.nih.gov/gene/?term=AAEL014396	Yeast Two hybrid test	Identification of New Protein Interactions between Dengue Fever Virus and Its Hosts, Human and Mosquito	Dumrong Mairiang et al.	PMID:23326450,PMC3543448
1,2,3,4	NS3	downregulated by	AAEL014843	5565405	http://www.ncbi.nlm.nih.gov/gene/?term=AAEL014843	Yeast Two hybrid test	Identification of New Protein Interactions between Dengue Fever Virus and Its Hosts, Human and Mosquito	Dumrong Mairiang et al.	PMID:23326450,PMC3543448
1,2,3,4	NS3	interacts with	AAEL014843	5565405	http://www.ncbi.nlm.nih.gov/gene/?term=AAEL014843	Yeast Two hybrid test	Identification of New Protein Interactions between Dengue Fever Virus and Its Hosts, Human and Mosquito	Dumrong Mairiang et al.	PMID:23326450,PMC3543448
1,2,3,4	NS3	downregulated by	AAEL014845	5565404	http://www.ncbi.nlm.nih.gov/gene/?term=AAEL014845	Yeast Two hybrid test	Identification of New Protein Interactions between Dengue Fever Virus and Its Hosts, Human and Mosquito	Dumrong Mairiang et al.	PMID:23326450,PMC3543448
1,2,3,4	NS5	interacts with	AAEL003739	5578845	http://www.ncbi.nlm.nih.gov/gene/?term=AAEL003739	Yeast Two hybrid test	Identification of New Protein Interactions between Dengue Fever Virus and Its Hosts, Human and Mosquito	Dumrong Mairiang et al.	PMID:23326450,PMC3543448
1,2,3,4	NS5	interacts with	AAEL003973	5579798	http://www.ncbi.nlm.nih.gov/gene/?term=AAEL003973	Yeast Two hybrid test	Identification of New Protein Interactions between Dengue Fever Virus and Its Hosts, Human and Mosquito	Dumrong Mairiang et al.	PMID:23326450,PMC3543448
1,2,3,4	NS5	interacts with	AAEL004100	5564132	http://www.ncbi.nlm.nih.gov/gene/?term=AAEL004100	Yeast Two hybrid test	Identification of New Protein Interactions between Dengue Fever Virus and Its Hosts, Human and Mosquito	Dumrong Mairiang et al.	PMID:23326450,PMC3543448
1,2,3,4	NS5	interacts with	AAEL004316	5564548	http://www.ncbi.nlm.nih.gov/gene/?term=AAEL004316	Yeast Two hybrid test	Identification of New Protein Interactions between Dengue Fever Virus and Its Hosts, Human and Mosquito	Dumrong Mairiang et al.	PMID:23326450,PMC3543448
1,2,3,4	NS5	interacts with	AAEL005790	5567037	http://www.ncbi.nlm.nih.gov/gene/?term=AAEL005790	Yeast Two hybrid test	Identification of New Protein Interactions between Dengue Fever Virus and Its Hosts, Human and Mosquito	Dumrong Mairiang et al.	PMID:23326450,PMC3543448
1,2,3,4	NS5	interacts with	AAEL006572	5568132	http://www.ncbi.nlm.nih.gov/gene/?term=AAEL006572	Yeast Two hybrid test	Identification of New Protein Interactions between Dengue Fever Virus and Its Hosts, Human and Mosquito	Dumrong Mairiang et al.	PMID:23326450,PMC3543448
1,2,3,4	NS5	interacts with	AAEL009460	5571977	http://www.ncbi.nlm.nih.gov/gene/?term=AAEL009460	Yeast Two hybrid test	Identification of New Protein Interactions between Dengue Fever Virus and Its Hosts, Human and Mosquito	Dumrong Mairiang et al.	PMID:23326450,PMC3543448
1,2,3,4	NS5	interacts with	AAEL009484	5571996	http://www.ncbi.nlm.nih.gov/gene/?term=AAEL009484	Yeast Two hybrid test	Identification of New Protein Interactions between Dengue Fever Virus and Its Hosts, Human and Mosquito	Dumrong Mairiang et al.	PMID:23326450,PMC3543448
1,2,3,4	NS5	interacts with	AAEL010066	5572832	http://www.ncbi.nlm.nih.gov/gene/?term=AAEL010066	Yeast Two hybrid test	Identification of New Protein Interactions between Dengue Fever Virus and Its Hosts, Human and Mosquito	Dumrong Mairiang et al.	PMID:23326450,PMC3543448
1,2,3,4	NS5	interacts with	AAEL010975	5574161	http://www.ncbi.nlm.nih.gov/gene/?term=AAEL010975	Yeast Two hybrid test	Identification of New Protein Interactions between Dengue Fever Virus and Its Hosts, Human and Mosquito	Dumrong Mairiang et al.	PMID:23326450,PMC3543448
1,2,3,4	NS5	interacts with	AAEL012095	5575828	http://www.ncbi.nlm.nih.gov/gene/?term=AAEL012095	Yeast Two hybrid test	Identification of New Protein Interactions between Dengue Fever Virus and Its Hosts, Human and Mosquito	Dumrong Mairiang et al.	PMID:23326450,PMC3543448
1,2,3,4	NS5	interacts with	AAEL012237	5576008	http://www.ncbi.nlm.nih.gov/gene/?term=AAEL012237	Yeast Two hybrid test	Identification of New Protein Interactions between Dengue Fever Virus and Its Hosts, Human and Mosquito	Dumrong Mairiang et al.	PMID:23326450,PMC3543448
1,2,3,4	NS5	interacts with	AAEL012348	5576153	http://www.ncbi.nlm.nih.gov/gene/?term=AAEL012348	Yeast Two hybrid test	Identification of New Protein Interactions between Dengue Fever Virus and Its Hosts, Human and Mosquito	Dumrong Mairiang et al.	PMID:23326450,PMC3543448
1,2,3,4	NS5	interacts with	AAEL012680	5576656	http://www.ncbi.nlm.nih.gov/gene/?term=AAEL012680	Yeast Two hybrid test	Identification of New Protein Interactions between Dengue Fever Virus and Its Hosts, Human and Mosquito	Dumrong Mairiang et al.	PMID:23326450,PMC3543448
1,2,3,4	NS5	interacts with	AAEL014396	5564364	http://www.ncbi.nlm.nih.gov/gene/?term=AAEL014396	Yeast Two hybrid test	Identification of New Protein Interactions between Dengue Fever Virus and Its Hosts, Human and Mosquito	Dumrong Mairiang et al.	PMID:23326450,PMC3543448
1,2,3,4	PrM/M	interacts with	AAEL010266	5573080	http://www.ncbi.nlm.nih.gov/gene/?term=AAEL010266	Yeast Two hybrid test	Identification of New Protein Interactions between Dengue Fever Virus and Its Hosts, Human and Mosquito	Dumrong Mairiang et al.	PMID:23326450,PMC3543448
1,2,4	C	interacts with	AAEL003815	5579120	http://www.ncbi.nlm.nih.gov/gene/?term=AAEL003815	Yeast Two hybrid test	Characterization of intracellular interactions between dengue virus and host proteins	Dumrong Mairiang	http://digitalcommons.wayne.edu/oa_dissertations/551
1,2,4	C	interacts with	AAEL005790	5567037	http://www.ncbi.nlm.nih.gov/gene/?term=AAEL005790	Yeast Two hybrid test	Characterization of intracellular interactions between dengue virus and host proteins	Dumrong Mairiang	http://digitalcommons.wayne.edu/oa_dissertations/551
1,2,4	E	interacts with	AAEL000005	5563587	http://www.ncbi.nlm.nih.gov/gene/?term=AAEL000005	Yeast Two hybrid test	Characterization of intracellular interactions between dengue virus and host proteins	Dumrong Mairiang	http://digitalcommons.wayne.edu/oa_dissertations/551
1,2,4	E	interacts with	AAEL001984	5573120	http://www.ncbi.nlm.nih.gov/gene/?term=AAEL001984	Yeast Two hybrid test	Characterization of intracellular interactions between dengue virus and host proteins	Dumrong Mairiang	http://digitalcommons.wayne.edu/oa_dissertations/551
1,2,4	E	interacts with	AAEL002057	5573397	http://www.ncbi.nlm.nih.gov/gene/?term=AAEL002057	Yeast Two hybrid test	Characterization of intracellular interactions between dengue virus and host proteins	Dumrong Mairiang	http://digitalcommons.wayne.edu/oa_dissertations/551
1,2,4	E	interacts with	AAEL002508	5574980	http://www.ncbi.nlm.nih.gov/gene/?term=AAEL002508	Yeast Two hybrid test	Characterization of intracellular interactions between dengue virus and host proteins	Dumrong Mairiang	http://digitalcommons.wayne.edu/oa_dissertations/551
1,2,4	E	interacts with	AAEL003815	5579120	http://www.ncbi.nlm.nih.gov/gene/?term=AAEL003815	Yeast Two hybrid test	Characterization of intracellular interactions between dengue virus and host proteins	Dumrong Mairiang	http://digitalcommons.wayne.edu/oa_dissertations/551
1,2,4	E	interacts with	AAEL004100	5564132	http://www.ncbi.nlm.nih.gov/gene/?term=AAEL004100	Yeast Two hybrid test	Characterization of intracellular interactions between dengue virus and host proteins	Dumrong Mairiang	http://digitalcommons.wayne.edu/oa_dissertations/551
1,2,4	E	interacts with	AAEL004484	5564924	http://www.ncbi.nlm.nih.gov/gene/?term=AAEL004484	Yeast Two hybrid test	Characterization of intracellular interactions between dengue virus and host proteins	Dumrong Mairiang	http://digitalcommons.wayne.edu/oa_dissertations/551
1,2,4	E	interacts with	AAEL004869	5565616	http://www.ncbi.nlm.nih.gov/gene/?term=AAEL004869	Yeast Two hybrid test	Characterization of intracellular interactions between dengue virus and host proteins	Dumrong Mairiang	http://digitalcommons.wayne.edu/oa_dissertations/551
1,2,4	E	interacts with	AAEL005567	5566684	http://www.ncbi.nlm.nih.gov/gene/?term=AAEL005567	Yeast Two hybrid test	Characterization of intracellular interactions between dengue virus and host proteins	Dumrong Mairiang	http://digitalcommons.wayne.edu/oa_dissertations/551
1,2,4	E	interacts with	AAEL009182	5571603	http://www.ncbi.nlm.nih.gov/gene/?term=AAEL009182	Yeast Two hybrid test	Characterization of intracellular interactions between dengue virus and host proteins	Dumrong Mairiang	http://digitalcommons.wayne.edu/oa_dissertations/551
1,2,4	E	interacts with	AAEL009285	5571766	http://www.ncbi.nlm.nih.gov/gene/?term=AAEL009285	Yeast Two hybrid test	Characterization of intracellular interactions between dengue virus and host proteins	Dumrong Mairiang	http://digitalcommons.wayne.edu/oa_dissertations/551
1,2,4	E	interacts with	AAEL009948	5572673	http://www.ncbi.nlm.nih.gov/gene/?term=AAEL009948	Yeast Two hybrid test	Characterization of intracellular interactions between dengue virus and host proteins	Dumrong Mairiang	http://digitalcommons.wayne.edu/oa_dissertations/551
1,2,4	E	interacts with	AAEL010585	5573545	http://www.ncbi.nlm.nih.gov/gene/?term=AAEL010585	Yeast Two hybrid test	Characterization of intracellular interactions between dengue virus and host proteins	Dumrong Mairiang	http://digitalcommons.wayne.edu/oa_dissertations/551
1,2,4	E	interacts with	AAEL010782	5573858	http://www.ncbi.nlm.nih.gov/gene/?term=AAEL010782	Yeast Two hybrid test	Characterization of intracellular interactions between dengue virus and host proteins	Dumrong Mairiang	http://digitalcommons.wayne.edu/oa_dissertations/551
1,2,4	E	interacts with	AAEL010784	5573866	http://www.ncbi.nlm.nih.gov/gene/?term=AAEL010784	Yeast Two hybrid test	Characterization of intracellular interactions between dengue virus and host proteins	Dumrong Mairiang	http://digitalcommons.wayne.edu/oa_dissertations/551
1,2,4	E	interacts with	AAEL010821	5573974	http://www.ncbi.nlm.nih.gov/gene/?term=AAEL010821	Yeast Two hybrid test	Characterization of intracellular interactions between dengue virus and host proteins	Dumrong Mairiang	http://digitalcommons.wayne.edu/oa_dissertations/551
1,2,4	E	interacts with	AAEL011137	5574420	http://www.ncbi.nlm.nih.gov/gene/?term=AAEL011137	Yeast Two hybrid test	Characterization of intracellular interactions between dengue virus and host proteins	Dumrong Mairiang	http://digitalcommons.wayne.edu/oa_dissertations/551
1,2,4	E	interacts with	AAEL011708	5575238	http://www.ncbi.nlm.nih.gov/gene/?term=AAEL011708	Yeast Two hybrid test	Characterization of intracellular interactions between dengue virus and host proteins	Dumrong Mairiang	http://digitalcommons.wayne.edu/oa_dissertations/551
1,2,4	E	interacts with	AAEL012095	5575828	http://www.ncbi.nlm.nih.gov/gene/?term=AAEL012095	Yeast Two hybrid test	Characterization of intracellular interactions between dengue virus and host proteins	Dumrong Mairiang	http://digitalcommons.wayne.edu/oa_dissertations/551
1,2,4	E	interacts with	AAEL012680	5576656	http://www.ncbi.nlm.nih.gov/gene/?term=AAEL012680	Yeast Two hybrid test	Characterization of intracellular interactions between dengue virus and host proteins	Dumrong Mairiang	http://digitalcommons.wayne.edu/oa_dissertations/551
1,2,4	E	interacts with	AAEL012686	5576653	http://www.ncbi.nlm.nih.gov/gene/?term=AAEL012686	Yeast Two hybrid test	Characterization of intracellular interactions between dengue virus and host proteins	Dumrong Mairiang	http://digitalcommons.wayne.edu/oa_dissertations/551
1,2,4	E	interacts with	AAEL013075	5577193	http://www.ncbi.nlm.nih.gov/gene/?term=AAEL013075	Yeast Two hybrid test	Characterization of intracellular interactions between dengue virus and host proteins	Dumrong Mairiang	http://digitalcommons.wayne.edu/oa_dissertations/551
1,2,4	NS3	interacts with	AAEL007850			Yeast Two hybrid test	Characterization of intracellular interactions between dengue virus and host proteins	Dumrong Mairiang	http://digitalcommons.wayne.edu/oa_dissertations/551
1,2,4	NS5	interacts with	AAEL000752	5566633	http://www.ncbi.nlm.nih.gov/gene/?term=AAEL000752	Yeast Two hybrid test	Identification of New Protein Interactions between Dengue Fever Virus and Its Hosts, Human and Mosquito	Dumrong Mairiang et al.	PMID:23326450,PMC3543448
1,2,4	NS5	interacts with	AAEL014012	5579140	http://www.ncbi.nlm.nih.gov/gene/?term=AAEL014012	Yeast Two hybrid test	Identification of New Protein Interactions between Dengue Fever Virus and Its Hosts, Human and Mosquito	Dumrong Mairiang et al.	PMID:23326450,PMC3543448
1,2,4	NS5	interacts with	AAEL014104	5563759	http://www.ncbi.nlm.nih.gov/gene/?term=AAEL014104	Yeast Two hybrid test	Identification of New Protein Interactions between Dengue Fever Virus and Its Hosts, Human and Mosquito	Dumrong Mairiang et al.	PMID:23326450,PMC3543448
1,3	C	interacts with	AAEL005567	5566684	http://www.ncbi.nlm.nih.gov/gene/?term=AAEL005567	Yeast Two hybrid test	Identification of New Protein Interactions between Dengue Fever Virus and Its Hosts, Human and Mosquito	Dumrong Mairiang et al.	PMID:23326450,PMC3543448
1,3	NS5	interacts with	AAEL009614	5572199	http://www.ncbi.nlm.nih.gov/gene/?term=AAEL009614	Yeast Two hybrid test	Identification of New Protein Interactions between Dengue Fever Virus and Its Hosts, Human and Mosquito	Dumrong Mairiang et al.	PMID:23326450,PMC3543448
1,4	C	interacts with	AAEL012527	5576438	http://www.ncbi.nlm.nih.gov/gene/?term=AAEL012527	Yeast Two hybrid test	Characterization of intracellular interactions between dengue virus and host proteins	Dumrong Mairiang	http://digitalcommons.wayne.edu/oa_dissertations/551
1,4	E	interacts with	AAEL001892	5572813	http://www.ncbi.nlm.nih.gov/gene/?term=AAEL001892	Yeast Two hybrid test	Characterization of intracellular interactions between dengue virus and host proteins	Dumrong Mairiang	http://digitalcommons.wayne.edu/oa_dissertations/551
1,4	E	interacts with	AAEL002565	5580168	http://www.ncbi.nlm.nih.gov/gene/?term=AAEL002565	Yeast Two hybrid test	Characterization of intracellular interactions between dengue virus and host proteins	Dumrong Mairiang	http://digitalcommons.wayne.edu/oa_dissertations/551
1,4	E	interacts with	AAEL003345	5577897	http://www.ncbi.nlm.nih.gov/gene/?term=AAEL003345	Yeast Two hybrid test	Characterization of intracellular interactions between dengue virus and host proteins	Dumrong Mairiang	http://digitalcommons.wayne.edu/oa_dissertations/551
1,4	E	interacts with	AAEL005165	5566087	http://www.ncbi.nlm.nih.gov/gene/?term=AAEL005165	Yeast Two hybrid test	Characterization of intracellular interactions between dengue virus and host proteins	Dumrong Mairiang	http://digitalcommons.wayne.edu/oa_dissertations/551
1,4	E	interacts with	AAEL007201	5568916	http://www.ncbi.nlm.nih.gov/gene/?term=AAEL007201	Yeast Two hybrid test	Characterization of intracellular interactions between dengue virus and host proteins	Dumrong Mairiang	http://digitalcommons.wayne.edu/oa_dissertations/551
1,4	E	interacts with	AAEL008052	5569954	http://www.ncbi.nlm.nih.gov/gene/?term=AAEL008052	Yeast Two hybrid test	Characterization of intracellular interactions between dengue virus and host proteins	Dumrong Mairiang	http://digitalcommons.wayne.edu/oa_dissertations/551
1,4	E	interacts with	AAEL008746	5571010	http://www.ncbi.nlm.nih.gov/gene/?term=AAEL008746	Yeast Two hybrid test	Characterization of intracellular interactions between dengue virus and host proteins	Dumrong Mairiang	http://digitalcommons.wayne.edu/oa_dissertations/551
1,4	E	interacts with	AAEL009101	5571466	http://www.ncbi.nlm.nih.gov/gene/?term=AAEL009101	Yeast Two hybrid test	Characterization of intracellular interactions between dengue virus and host proteins	Dumrong Mairiang	http://digitalcommons.wayne.edu/oa_dissertations/551
1,4	E	interacts with	AAEL009484	5571996	http://www.ncbi.nlm.nih.gov/gene/?term=AAEL009484	Yeast Two hybrid test	Characterization of intracellular interactions between dengue virus and host proteins	Dumrong Mairiang	http://digitalcommons.wayne.edu/oa_dissertations/551
1,4	E	interacts with	AAEL009766	5572378	http://www.ncbi.nlm.nih.gov/gene/?term=AAEL009766	Yeast Two hybrid test	Characterization of intracellular interactions between dengue virus and host proteins	Dumrong Mairiang	http://digitalcommons.wayne.edu/oa_dissertations/551
1,4	E	interacts with	AAEL010066	5572832	http://www.ncbi.nlm.nih.gov/gene/?term=AAEL010066	Yeast Two hybrid test	Characterization of intracellular interactions between dengue virus and host proteins	Dumrong Mairiang	http://digitalcommons.wayne.edu/oa_dissertations/551
1,4	E	interacts with	AAEL011129	5574403	http://www.ncbi.nlm.nih.gov/gene/?term=AAEL011129	Yeast Two hybrid test	Characterization of intracellular interactions between dengue virus and host proteins	Dumrong Mairiang	http://digitalcommons.wayne.edu/oa_dissertations/551
1,4	E	interacts with	AAEL011742	5575273	http://www.ncbi.nlm.nih.gov/gene/?term=AAEL011742	Yeast Two hybrid test	Characterization of intracellular interactions between dengue virus and host proteins	Dumrong Mairiang	http://digitalcommons.wayne.edu/oa_dissertations/551
1,4	E	interacts with	AAEL012556	5576503	http://www.ncbi.nlm.nih.gov/gene/?term=AAEL012556	Yeast Two hybrid test	Characterization of intracellular interactions between dengue virus and host proteins	Dumrong Mairiang	http://digitalcommons.wayne.edu/oa_dissertations/551
1,4	E	interacts with	AAEL013933	5578954	http://www.ncbi.nlm.nih.gov/gene/?term=AAEL013933	Yeast Two hybrid test	Characterization of intracellular interactions between dengue virus and host proteins	Dumrong Mairiang	http://digitalcommons.wayne.edu/oa_dissertations/551
1,4	NS5	interacts with	AAEL014281	5564027	http://www.ncbi.nlm.nih.gov/gene/?term=AAEL014281	Yeast Two hybrid test	Identification of New Protein Interactions between Dengue Fever Virus and Its Hosts, Human and Mosquito	Dumrong Mairiang et al.	PMID:23326450,PMC3543448
2,4	C	interacts with	AAEL007201	5568916	http://www.ncbi.nlm.nih.gov/gene/?term=AAEL007201	Yeast Two hybrid test	Characterization of intracellular interactions between dengue virus and host proteins	Dumrong Mairiang	http://digitalcommons.wayne.edu/oa_dissertations/551
	C	interacts with	AAEL003670	5578748	http://www.ncbi.nlm.nih.gov/gene/?term=AAEL003670	Yeast Two hybrid test	Identification of New Protein Interactions between Dengue Fever Virus and Its Hosts, Human and Mosquito	Dumrong Mairiang et al.	PMID:23326450,PMC3543448
	C	interacts with	AAEL003863	5579086	http://www.ncbi.nlm.nih.gov/gene/?term=AAEL003863	Yeast Two hybrid test	Identification of New Protein Interactions between Dengue Fever Virus and Its Hosts, Human and Mosquito	Dumrong Mairiang et al.	PMID:23326450,PMC3543448
	C	interacts with	AAEL010782	5573858	http://www.ncbi.nlm.nih.gov/gene/?term=AAEL010782	Yeast Two hybrid test	Identification of New Protein Interactions between Dengue Fever Virus and Its Hosts, Human and Mosquito	Dumrong Mairiang et al.	PMID:23326450,PMC3543448
	C	interacts with	AAEL015390	5579467	http://www.ncbi.nlm.nih.gov/gene/?term=AAEL015390	Yeast Two hybrid test	Identification of New Protein Interactions between Dengue Fever Virus and Its Hosts, Human and Mosquito	Dumrong Mairiang et al.	PMID:23326450,PMC3543448
	C	interacts with	AAEL015681	5579087	http://www.ncbi.nlm.nih.gov/gene/?term=AAEL015681	Yeast Two hybrid test	Identification of New Protein Interactions between Dengue Fever Virus and Its Hosts, Human and Mosquito	Dumrong Mairiang et al.	PMID:23326450,PMC3543448
	NS3	downregulates	AAEL000709	5565922	http://www.ncbi.nlm.nih.gov/gene/?term=AAEL000709	Yeast Two hybrid test	Identification of New Protein Interactions between Dengue Fever Virus and Its Hosts, Human and Mosquito	Dumrong Mairiang et al.	PMID:23326450,PMC3543448
	NS3	interacts with	AAEL002145	5580096	http://www.ncbi.nlm.nih.gov/gene/?term=AAEL002145	Yeast Two hybrid test	Identification of New Protein Interactions between Dengue Fever Virus and Its Hosts, Human and Mosquito	Dumrong Mairiang et al.	PMID:23326450,PMC3543448
	NS3	interacts with	AAEL002565	5580168	http://www.ncbi.nlm.nih.gov/gene/?term=AAEL002565	Yeast Two hybrid test	Identification of New Protein Interactions between Dengue Fever Virus and Its Hosts, Human and Mosquito	Dumrong Mairiang et al.	PMID:23326450,PMC3543448
	NS3	interacts with	AAEL004843	5565559	http://www.ncbi.nlm.nih.gov/gene/?term=AAEL004843	Yeast Two hybrid test	Identification of New Protein Interactions between Dengue Fever Virus and Its Hosts, Human and Mosquito	Dumrong Mairiang et al.	PMID:23326450,PMC3543448
	NS5	interacts with	AAEL012527	5576438	http://www.ncbi.nlm.nih.gov/gene/?term=AAEL012527	Yeast Two hybrid test	Identification of New Protein Interactions between Dengue Fever Virus and Its Hosts, Human and Mosquito	Dumrong Mairiang et al.	PMID:23326450,PMC3543448
	NS2A	interacts with	AAEL000032	5563590	http://www.ncbi.nlm.nih.gov/gene/?term=AAEL000032	Yeast Two hybrid test	Use of a tandem affinity purification assay to detect interactions between West Nile and dengue viral proteins and proteins of the mosquito vector	Tonya M. Colpitts et al.	PMID:21700306,PMCID:PMC3166580
	NS2A	interacts with	AAEL003670	5578748	http://www.ncbi.nlm.nih.gov/gene/?term=AAEL003670	Yeast Two hybrid test	Use of a tandem affinity purification assay to detect interactions between West Nile and dengue viral proteins and proteins of the mosquito vector	Tonya M. Colpitts et al.	PMID:21700306,PMCID:PMC3166580
	NS2A	interacts with	AAEL017096	23687516	http://www.ncbi.nlm.nih.gov/gene/?term=AAEL017096	Yeast Two hybrid test	Use of a tandem affinity purification assay to detect interactions between West Nile and dengue viral proteins and proteins of the mosquito vector	Tonya M. Colpitts et al.	PMID:21700306,PMCID:PMC3166580
	NS4B	interacts with	AAEL001928	5572986	http://www.ncbi.nlm.nih.gov/gene/?term=AAEL001928	Yeast Two hybrid test	Use of a tandem affinity purification assay to detect interactions between West Nile and dengue viral proteins and proteins of the mosquito vector	Tonya M. Colpitts et al.	PMID:21700306,PMCID:PMC3166580
	NS4B	interacts with	AAEL017096	23687516	http://www.ncbi.nlm.nih.gov/gene/?term=AAEL017096	Yeast Two hybrid test	Use of a tandem affinity purification assay to detect interactions between West Nile and dengue viral proteins and proteins of the mosquito vector	Tonya M. Colpitts et al.	PMID:21700306,PMCID:PMC3166580
